# Supplementary material for: Simultaneous estimation of wintertime sea ice thickness and snowdepth from space-borne freeboard measurements
Source: Copernicus journal article supplement (doi:10.5194/tc-2020-27), 2020-02-25
Supplement: Supplementary file [file tc-2020-27-RC1-supplement.pdf]

# Review of: Estimating the snow depth, the snow–ice interface temperature, and the effective temperature of Arctic sea ice using Advanced Microwave Scanning Radiometer 2 and ice mass balance buoy data

## 1 Introduction

### 1.1 Summary of Review

This manuscript addresses the issue of converting satellite radar ranging data to sea ice thickness estimates, while simultaneously retrieving the depth of the overlying snow. This is done through a novel linear mapping of the temperature gradients in the snow and ice to the thickness values of the materials.

However the manuscript does contain a technical issue which affects its application to CryoSat-2 data (described in Sect. 2.2), which must be remedied before publication. In short, the freeboard data used in the study have been calculated using the modified Warren climatology, so any thickness estimates resulting from them cannot be independent of that climatology.

Otherwise, this manuscript contains a novel approach to estimating the depth of snow on sea ice, and the authors show that the related thickness values match OIB thickness values more closely than those resulting from use of the modified Warren climatology.

I believe that if the issues presented in this review can be resolved, subsequent publication of this manuscript would be of significant interest to the sea ice community.

### 1.2 Summary of the Technique Presented

Sea ice thickness is conventionally estimated from ice freeboard as such (using the notation of this paper):

$$H = \frac{h_f \rho_w + h \rho_s}{\rho_w - \rho_i} \quad (1)$$

Where  $H$  is sea ice thickness,  $h_f$  the height of the snow ice interface above the waterline, and  $h$  the depth of the overlying snow.  $\rho$  values represent the densities of overlying snow, water and ice. From the above, it can be seen that for  $h_f$  to be converted to  $H$ ,  $h$  must be known (as well as all the density values). Unfortunately despite a major research effort to map the spatial distribution of  $h$ , it remains highly uncertain.

One of the novelties of this paper is the authors' framing of the problem thus:

$$H = h_f \frac{\rho_w}{\rho_w - \rho_i - (h/H)\rho_s} \quad (2)$$

This framing allows  $h_f$  to be converted to  $H$  without direct knowledge of  $h$ , instead it is sufficient just to know the ratio  $h/H$  - this is referred to as  $\alpha$ . The authors then show that this formulation is useful, by estimating  $(h/H)$  in a Pan-Arctic way using satellite-measured temperatures of the air-snow and snow-ice interfaces.

A byproduct of this approach is that snow depth ( $h$ ) is also trivially extracted:

$$h = h_f \frac{\rho_w}{\rho_w - \rho_i - (h/H)\rho_s} \times (h/H) \quad (3)$$

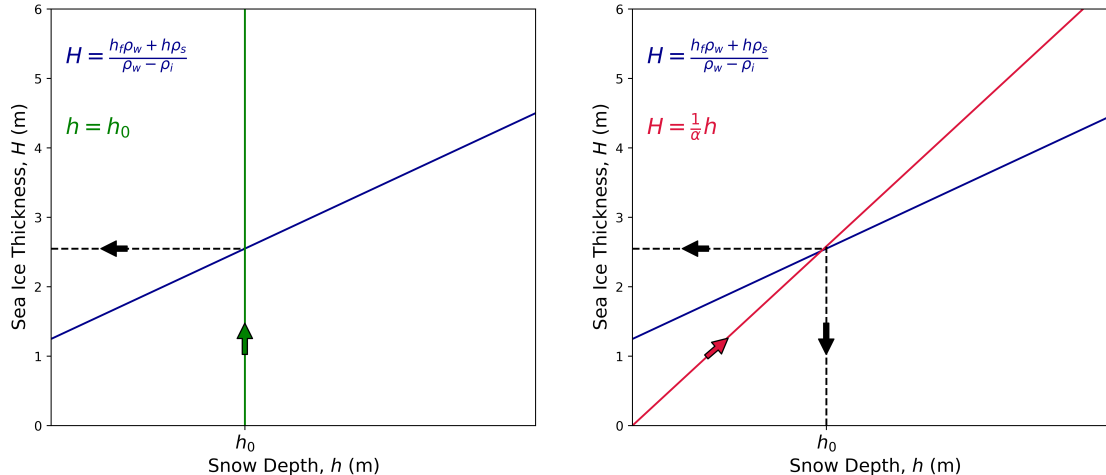

Figure 1: Graph of  $H, h$  space for a case with typical values of densities, snow depth and ice thickness

It should be noted that this approach of ‘simultaneously’ working out  $h$  and  $H$  is mathematically equivalent to first working out  $h$  using Eq. (3) and substituting the result into Eq. (1).

The method can be further understood graphically in  $h, H$  space, as in Figure 1. When the ice freeboard is known, the corresponding snow depth ( $h$ ) and ice thickness ( $H$ ) lie unconstrained in  $h, H$  space along the blue line described by Eq. (1).

Thickness is then traditionally determined by a priori knowledge of the snow depth ( $h_0$ ) - this is depicted in the left hand plot by the intersection of the green line (known snow depth) with the blue line.

This paper introduces a different relationship to constrain sea ice thickness, depicted on the right, revolving around the empirical parameter  $\alpha$ . By finding the intersection with the red ( $\alpha$ ) line and the blue line, the authors are able to simultaneously derive  $h$  and  $H$ .

## 2 Major Points

### 2.1 Difference between radar freeboard and scattering horizon height

L22: The statement “altimeters ... measure sea ice freeboard” is only approximately correct in the case of radar altimeters.

The instrument on board CS2 measures a time of flight, which can be related to the height of some radar scattering horizon only where no snow lies in between the scattering horizon and the instrument. When snow is in between and fully penetrated by the radar, the radar range to the scattering surface is overestimated due to slower pulse propagation in the overlying snow. Correcting for this and estimating the height of the ice-snow interface requires knowledge of the overlying snow (Mallett et al., 2020).

This issue surfaces again when the authors identify the radar freeboard as the height from the sea surface to the radar scattering horizon in L28. This is only the case for bare ice. Where overlying snow is present and fully penetrated, the radar freeboard is a finite distance below the ice freeboard (the assumed scattering surface). In the freeboard product used in this manuscript (Kurtz et al., 2014) this displacement is  $h_s(1 - c_s/c)$ .

This is relevant to Fig. 1, where  $h_{r,f}$  is depicted as being above the ice freeboard. While it may be true that the radar scattering horizon is above the snow-ice interface, in products that assume full radar penetration of the snowpack the radar freeboard is lower than the ice freeboard. Theoretically for total radar penetration and a freeboard depressed to near the water by snow, the radar freeboard can be below the waterline (while the ice freeboard and scattering horizon are above).

## 2.2 The freeboard product used by the authors has been created with mW99

In the final sentence of the abstract, the authors state:

“In conclusion, the developed  $\alpha$ -based method has the capacity to derive ice thickness and snow depth, without relying on the snow depth information as input to the buoyancy equation for converting freeboard to ice thickness.”

However, the method presented here works directly from ice freeboard data which can only be derived by relying on snow depth information (Sect. 5.1 & Eq. 15 of Kurtz et al., 2014).

I feel that what the authors would like to present is a way to convert *radar freeboards* to ice thickness without relying on snow depth data, and this should be done before publication. I think it is possible for the authors to adapt their processing chain to deal with this, although it may complicate things.

## 2.3 Uncertainty Analysis

The authors state in their Discussion and Conclusions section:

Overall, the developed  $\alpha$ -based method yields ice thickness and snow depth, without relying on a priori ‘uncertain’ snow depth information, which results in uncertainty in the ice thickness retrieval.

They are of course correct to identify that uncertainty in snow depth leads to uncertainty in the ice thickness retrieval. To avoid having to quantify snow depth, they instead rely on a parameter equal to  $h/H$ , which they empirically derive from the temperature of the air-snow and ice-snow interfaces.

Clearly there is significant uncertainty in the value of  $\alpha$ , and the authors should try to quantify how this propagates through into uncertainty in ice thickness. It’s possible that their  $\alpha$  parameter is more uncertain than other published data for  $h$ , and if so this method will deliver lower quality estimates of  $H$  than the traditional method.

It seems (looking at Fig. 1 of this review) that a given error in  $\alpha$  would have a more serious impact on  $H$  than the same error in  $h$ , because the gradients of the lines are much more similar in on the left panel of Fig. 1 than on the right. This issue scales with the alpha parameter (i.e. as the freeboard goes down), and at high  $\alpha$  very small uncertainties in alpha will lead to large uncertainties in  $H$ .

As alpha becomes so large that the freeboard tends to zero (not that uncommon in the Atlantic sector of the Arctic), the method seems to lose its usefulness, whereas the traditional method continues to function. That is to say in the case of near-zero freeboard, the traditional method still provides an estimate of  $H$ , but that proposed by the authors does not (see Eq. 7 as  $h_f \rightarrow 0$ ).

This is addressed in L 161/162, where a critical value is given for alpha, and it is explained that for alpha above this value data are not produced. How often does this occur? And what is the effect on  $H$  of small errors in alpha just below this critical threshold?

## 3 Minor Points

### 3.1 General

- L21: The authors should consider directing the reader to Laxon et al. (2003) when illustrating that thickness has been estimated for nearly two decades.
- When discussing studies indicating the height difference between the scattering horizon and the snow-ice interface, the authors should consider directing the reader to Nandan et al. (2017) and Willatt et al. (2010, 2011).
- L62 & 64: Define RTM before using the acronym.
- The font sizes of some annotations to Figure 3 should be increased so as to be legible and comparable to the (a), (b), (c) lettering.

- In Fig. 2, the box that reads ‘Find temperature discontinuity point’. It is my understanding that the temperature is continuous (but not a smooth function), and therefore it has no discontinuities (but its gradient does). Should this box then read ‘Find temperature gradient discontinuity point’?
- I think the notation of  $H$  and  $h$  in combination with  $h_f$ ,  $h_{rf}$  and  $h_{tf}$  is confusing to the casual reader. For instance, the fact that  $h$  and  $h_f$  look so similar but are in fact unrelated confused me initially. Even changing  $H \rightarrow H_{ice}$  and  $h \rightarrow h_{snow}$  would clarify this.

### 3.2 Validation of $H$ against OIB Data

The authors are able to create two products from freeboard data obtained by OIB and CryoSat-2, one for snow depth ( $h$ ), and one for ice thickness ( $H$ ). They then rightly try to assess the quality of these data products against other datasets, namely the OIB snow depth and ice thickness data.

There are at least five algorithms published to process the raw OIB radar returns into along-track snow depth data, and they produce a spread in the mean snow depth (Kwok et al., 2017). ‘Validation’ of a model or data implies comparison to true or certain values, and it is unclear which OIB snow depth product (if any) represents *the truth*. This limits the strength of the validation exercise. Nonetheless, I understand that OIB snow depth values have historically been taken as *the truth* in published work so this is a perhaps not a big issue. It might also be argued that the spread of different OIB data is sufficiently small relative to other methods of snow depth estimation to allow OIB to approximate the truth for validation purposes.

I feel that there is however a more significant issue with the authors’ claims to have ‘validated’ their ice thickness data against OIB ice thickness data ( $H_{OIB}$ ). OIB aircraft instruments do not measure thickness ( $H_{true}$ ) directly, but instead estimate it based on freeboard, snow depth, snow density and ice density values. As such, OIB thickness data (while likely to be the most accurate data on  $H_{true}$  outside of in-situ measurement), undoubtedly suffer from biases involving snow depth, snow density and ice density, and therefore should not be mistaken for  $H_{true}$ .

The technique for determining  $H_{OIB}$  is very similar to that presented in this manuscript: the authors use identical freeboard, snow density and ice density values to estimate thickness with the hydrostatic equilibrium assumption. Given these similarities, comparing the thickness estimates in this paper with OIB thickness estimates doesn’t really qualify as independent validation.

It seems more like the exercise of comparing  $H$  estimates is in fact comparing the novel snow depth estimates with OIB snow depths (Fig 7 top row; a valuable analysis), and then investigating how that singular difference propagates into sea ice thickness estimates.

I suspect that the strong agreement between the two datasets presented in the middle row of Fig. 7. is largely a result of the identical radar freeboards and geophysical parameters used in each processing chain. After all, much of sea ice thickness is determined by radar freeboard information, independent of snow data. The fact that the ‘simultaneous’ method matches  $H_{OIB}$  data more closely than MW99 is therefore evidence that the snow depth product produced by the ‘simultaneous’ method is closer to OIB snow depths than MW99 (because everything else is equal).

I think it is perfectly reasonable (and in fact expected) to compare  $H$  estimates from the new method with  $H_{OIB}$ . However, I think this should be presented as a ‘comparison with’ or ‘evaluation against’ OIB data, rather than implying that the new data are being validated against some true value. It is also an understandable bit of reasoning to say that values which are closer to  $H_{OIB}$  are likely to be closer to  $H_{true}$ , but if this assumption is made it should be stated explicitly.

### 3.3 Limitations of Other Data

L66 - 69:

Other approaches worth mentioning are snow depth retrieval using dual-frequency altimetry (Guerreiro et al., 2016; Lawrence et al., 2018, Kwok and Markus, 2018), snow on sea ice model accumulating snowfall from reanalysis (Petty et al., 2018), multilinear regression (Kilic et al., 2019), and the neural network approach (Braakmann-Folgmann and Donlon, 2019). However, these methods do not satisfactorily meet the criteria required for freeboard to ice conversion over the entire Arctic Ocean basin scale or multi-year time scale.

The approach of Guerreiro et al. (2016) and Lawrence et al. (2018) are limited latitudinally by the AltiKa orbital inclination and Lawrence et al. (2018) additionally through calibration with OIB which only operates in Spring. As the authors identify, they are limited in spatial or temporal extent.

While there are limitations to the data products of Petty et al. (2018), Kilic et al. (2019) and Braakmann-Folgmann and Donlon (2019), it's not obvious that these can be characterised by failure to cover the entire basin on a multiyear timescale. As such, the statement on L69 that they do not satisfactorily meet these criteria should be clarified.

### 3.4 Rainbow Color Schemes

Where possible, authors should avoid presenting continuous data with 'rainbow' color schemes as in Figures 6 & 8. This is because (among other reasons) the scheme tends to imply sharp transitions in the data where they do not exist (Borland and Taylor, 2007). Alternatives for geoscientists are given by Light and Bartlein (2004), Stauffer et al. (2015) and Thyng et al. (2016).

## References

- Borland, D. and Taylor, R. M.: Rainbow color map (still) considered harmful, *IEEE Computer Graphics and Applications*, 27, 14–17, <https://doi.org/10.1109/MCG.2007.323435>, 2007.
- Braakmann-Folgmann, A. and Donlon, C.: Estimating snow depth on Arctic sea ice using satellite microwave radiometry and a neural network, *The Cryosphere*, 13, 2421–2438, <https://doi.org/10.5194/tc-13-2421-2019>, URL <https://www.the-cryosphere.net/13/2421/2019/>, 2019.
- Guerreiro, K., Fleury, S., Zakharova, E., Rémy, F., and Kouraev, A.: Potential for estimation of snow depth on Arctic sea ice from CryoSat-2 and SARAL/AltiKa missions, *Remote Sensing of Environment*, 186, 339–349, <https://doi.org/10.1016/j.rse.2016.07.013>, URL <http://dx.doi.org/10.1016/j.rse.2016.07.013>, 2016.
- Kilic, L., Tage Tonboe, R., Prigent, C., and Heygster, G.: Estimating the snow depth, the snow-ice interface temperature, and the effective temperature of Arctic sea ice using Advanced Microwave Scanning Radiometer 2 and ice mass balance buoy data, *Cryosphere*, 13, 1283–1296, <https://doi.org/10.5194/tc-13-1283-2019>, 2019.
- Kurtz, N. T., Galin, N., and Studinger, M.: An improved CryoSat-2 sea ice freeboard retrieval algorithm through the use of waveform fitting, *Cryosphere*, 8, 1217–1237, <https://doi.org/10.5194/tc-8-1217-2014>, URL <https://www.the-cryosphere.net/8/1217/2014/>, 2014.
- Kwok, R., Kurtz, N. T., Brucker, L., Ivanoff, A., Newman, T., Farrell, S. L., King, J., Howell, S., Webster, M. A., Paden, J., Leuschen, C., MacGregor, J. A., Richter-Menge, J., Harbeck, J., and Tschudi, M.: Intercomparison of snow depth retrievals over Arctic sea ice from radar data acquired by Operation IceBridge, *The Cryosphere*, 11, 2571–2593, <https://doi.org/10.5194/tc-11-2571-2017>, URL <https://www.the-cryosphere.net/11/2571/2017/>, 2017.
- Lawrence, I. R., Tsamados, M. C., Stroeve, J. C., Armitage, T. W., and Ridout, A. L.: Estimating snow depth over Arctic sea ice from calibrated dual-frequency radar freeboards, *Cryosphere*, 12, 3551–3564, <https://doi.org/10.5194/tc-12-3551-2018>, URL <https://www.the-cryosphere.net/12/3551/2018/>, 2018.
- Laxon, S., Peacock, H., and Smith, D.: High interannual variability of sea ice thickness in the Arctic region, *Nature*, 425, 947–950, <https://doi.org/10.1038/nature02050>, 2003.
- Light, A. and Bartlein, P. J.: The end of the rainbow? color schemes for improved data graphics, *Eos*, 85, <https://doi.org/10.1029/2004EO400002>, 2004.

- Mallett, R. D. C., Lawrence, I. R., Stroeve, J. C., Landy, J. C., and Tsamados, M.: Brief communication: Conventional assumptions involving the speed of radar waves in snow introduce systematic underestimates to sea&#160;ice thickness and seasonal growth rate estimates, *The Cryosphere*, 14, 251–260, <https://doi.org/10.5194/tc-14-251-2020>, URL <https://www.the-cryosphere.net/14/251/2020/>, 2020.
- Nandan, V., Geldsetzer, T., Yackel, J., Mahmud, M., Scharien, R., Howell, S., King, J., Ricker, R., and Else, B.: Effect of Snow Salinity on CryoSat-2 Arctic First-Year Sea Ice Freeboard Measurements, *Geophysical Research Letters*, 44, 419–10, <https://doi.org/10.1002/2017GL074506>, URL <http://doi.wiley.com/10.1002/2017GL074506>, 2017.
- Petty, A. A., Webster, M., Boisvert, L., and Markus, T.: The NASA Eulerian Snow on Sea Ice Model (NESOSIM) v1.0: Initial model development and analysis, *Geoscientific Model Development*, 11, 4577–4602, <https://doi.org/10.5194/gmd-11-4577-2018>, 2018.
- Stauffer, R., Mayr, G. J., Dabernig, M., and Zeileis, A.: Somewhere over the rainbow: How to make effective use of colors in meteorological visualizations, *Bulletin of the American Meteorological Society*, 96, 203–216, <https://doi.org/10.1175/BAMS-D-13-00155.1>, 2015.
- Thyng, K. M., Greene, C. A., Hetland, R. D., Zimmerle, H. M., and DiMarco, S. F.: True colors of oceanography: Guidelines for effective and accurate colormap selection, <https://doi.org/10.5670/oceanog.2016.66>, 2016.
- Willatt, R., Laxon, S., Giles, K., Cullen, R., Haas, C., and Helm, V.: Ku-band radar penetration into snow cover on Arctic sea ice using airborne data, *Annals of Glaciology*, 52, 197–205, <https://doi.org/10.3189/172756411795931589>, 2011.
- Willatt, R. C., Giles, K. A., Laxon, S. W., Stone-Drake, L., and Worby, A. P.: Field investigations of Ku-band radar penetration into snow cover on antarctic sea ice, *IEEE Transactions on Geoscience and Remote Sensing*, 48, 365–372, <https://doi.org/10.1109/TGRS.2009.2028237>, URL <http://ieeexplore.ieee.org/document/5282596/>, 2010.
